# Supplementary material for: Utility of LysM-cre and Cdh5-cre Driver Mice in Retinal and Brain Research: An Imaging Study Using tdTomato Reporter Mouse
Source: PubMed Central journal article supplement — Invest Ophthalmol Vis Sci. 2020 Mar 30;61(3):51. doi: 10.1167/iovs.61.3.51 (PMC7405957; doi:10.1167/iovs.61.3.51), 2020-03-30
Supplement: iovs-61-3-51_s001.pdf [file iovs-61-3-51_s001.pdf]

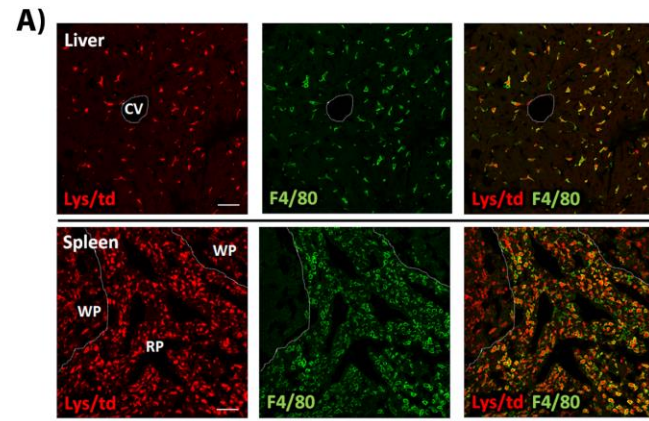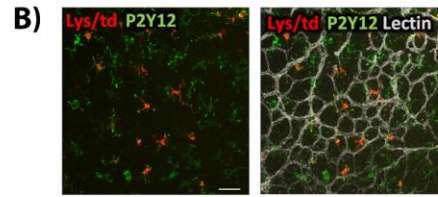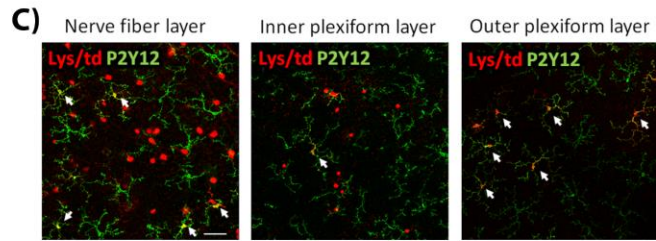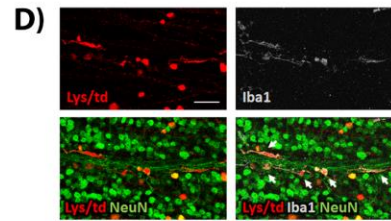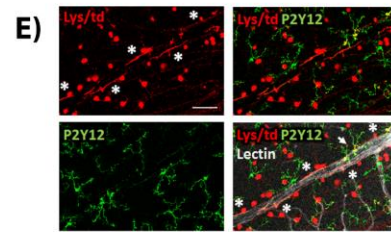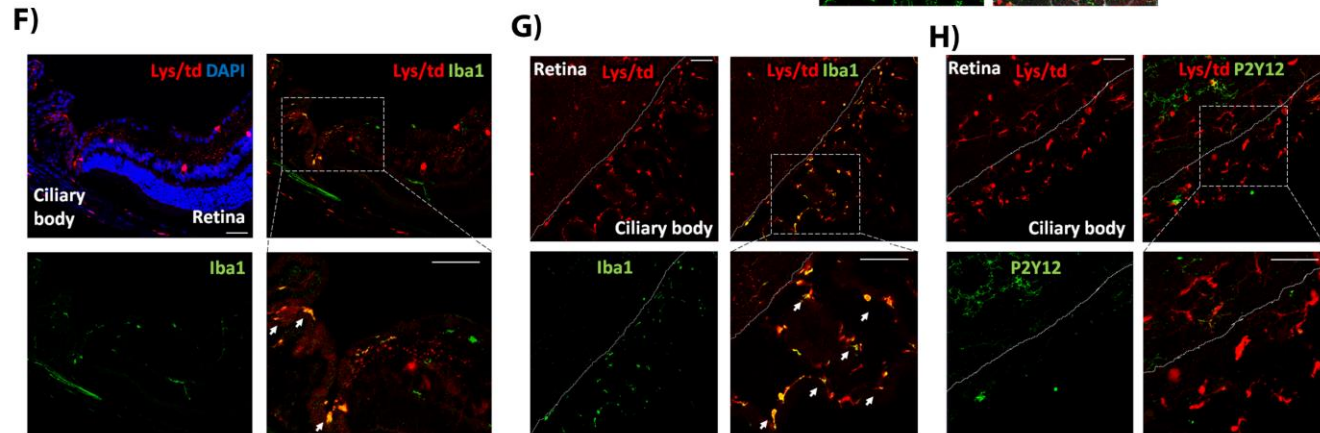

Figure S1:

A) Images of liver and spleen sections from adult Lys/td mouse showing expression of tdTomato in F4/80 positive macrophages. CV: central vein, RP: red pulp, WP: white pulp. Note that WP macrophages are negative for F4/80 but positive for Lys/td. B) P8 Lys/td retina flatmount co-labeling with P2Y12 and lectin. C) Adult Lys/td retina flatmount co-labeling with P2Y12. D, E) Lys/td expression in perivascular macrophages that are positive for Iba1 (arrows) but not P2Y12 (asterisks). F, G) Lys/td expression in Iba1 positive ciliary body macrophages in cross-section and flatmount respectively. H) Ciliary body macrophages are negative for P2Y12.
