# Supplementary material for: Utility of LysM-cre and Cdh5-cre Driver Mice in Retinal and Brain Research: An Imaging Study Using tdTomato Reporter Mouse
Source: PubMed Central journal article supplement — Invest Ophthalmol Vis Sci. 2020 Mar 30;61(3):51. doi: 10.1167/iovs.61.3.51 (PMC7405957; doi:10.1167/iovs.61.3.51), 2020-03-30
Supplement: iovs-61-3-51_s002.pdf [file iovs-61-3-51_s002.pdf]

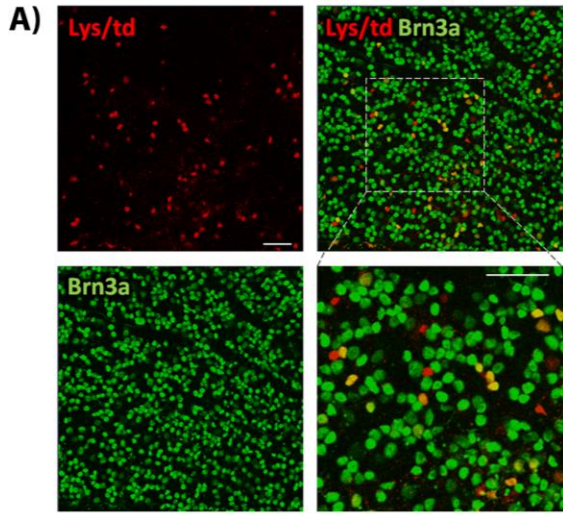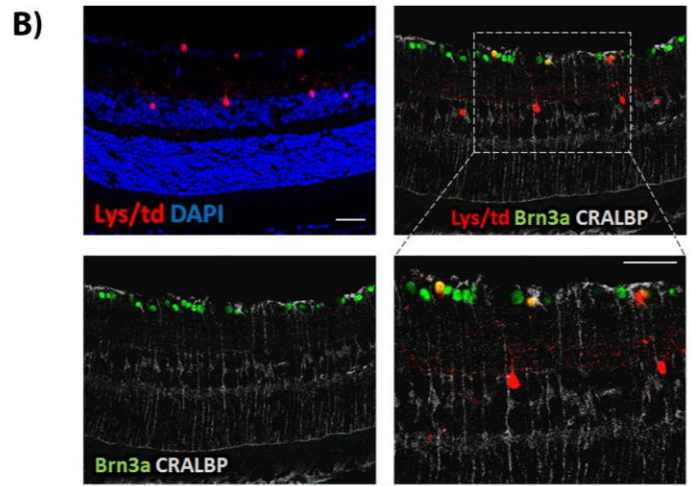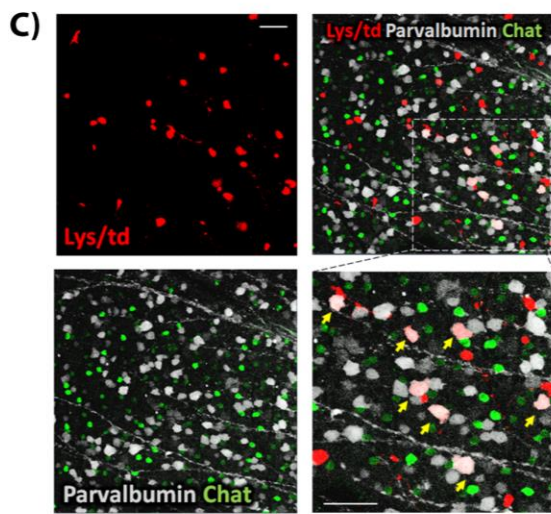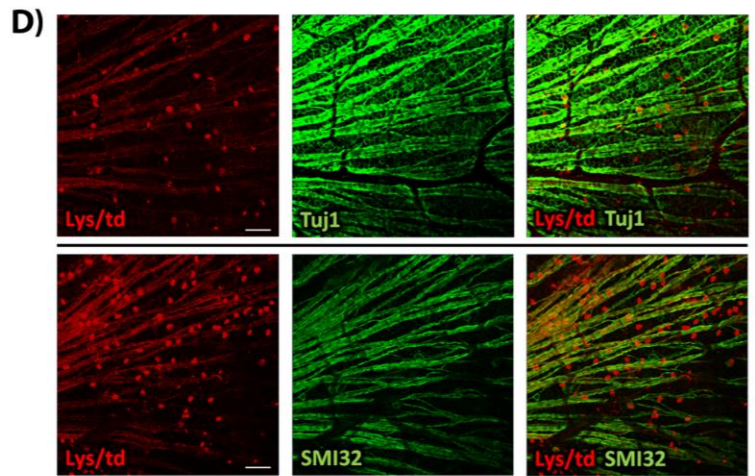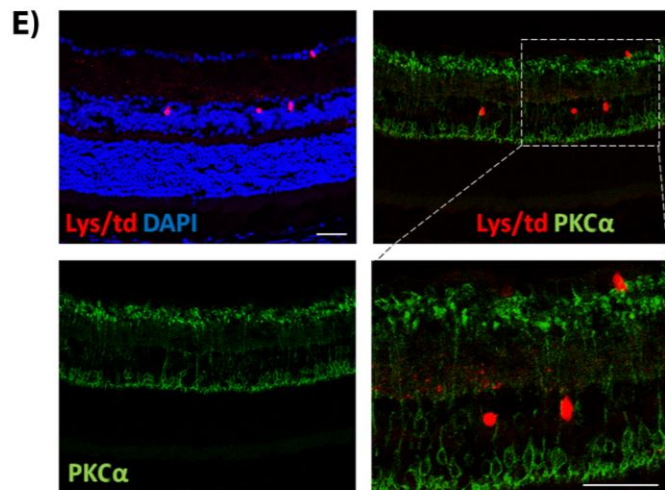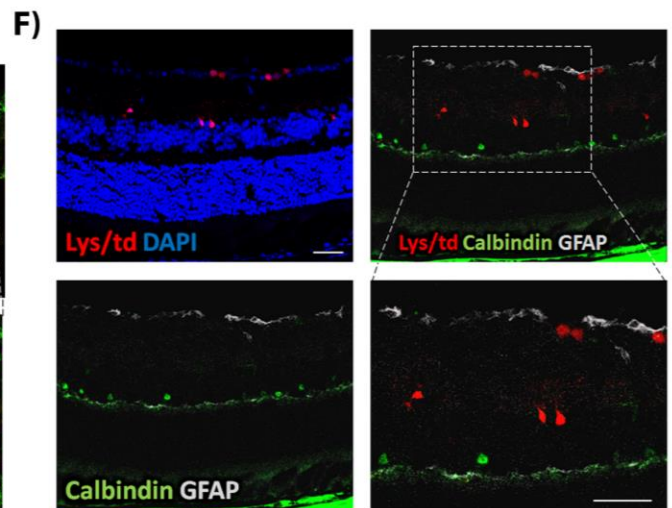

Figure S2:

A) Images of retina flatmount from adult Lys/td co-labeled with Brn3a. B) retina cross-sections from adult Lys/td co-labeled with Brn3a and CRALBP. C) Lys/td adult retina flatmount co-labeled with parvalbumin and ChAT. D) Lys/td adult retina flatmount labeled with the axonal markers, Tuj1 and SMI32. E) Lys/td adult retina cross-section labeled with PKC $\alpha$ . F) Lys/td adult retina cross-section labeled with GFAP and calbindin.
